# Supplementary material
Source: PubMed Central journal article supplement (PMC4247834)
Supplement: NIHMS635555-supplement-Supplement.pdf [file NIHMS635555-supplement-Supplement.pdf]

## Supporting Information

© Copyright Wiley-VCH Verlag GmbH & Co. KGaA, 69451 Weinheim, 2013

### **Microscale Gradients of Oxygen, Hydrogen Peroxide, and pH in Freshwater Cathodic Biofilms**

Jerome T. Babauta, Hung Duc Nguyen, Ozlem Istanbulu, and Haluk Beyenal<sup>\*[a]</sup>

[cssc\\_201300019\\_sm\\_miscellaneous\\_information.pdf](#)

1  
2  
3

*Manganese cycling in biofilms of manganese-oxidizing bacteria*

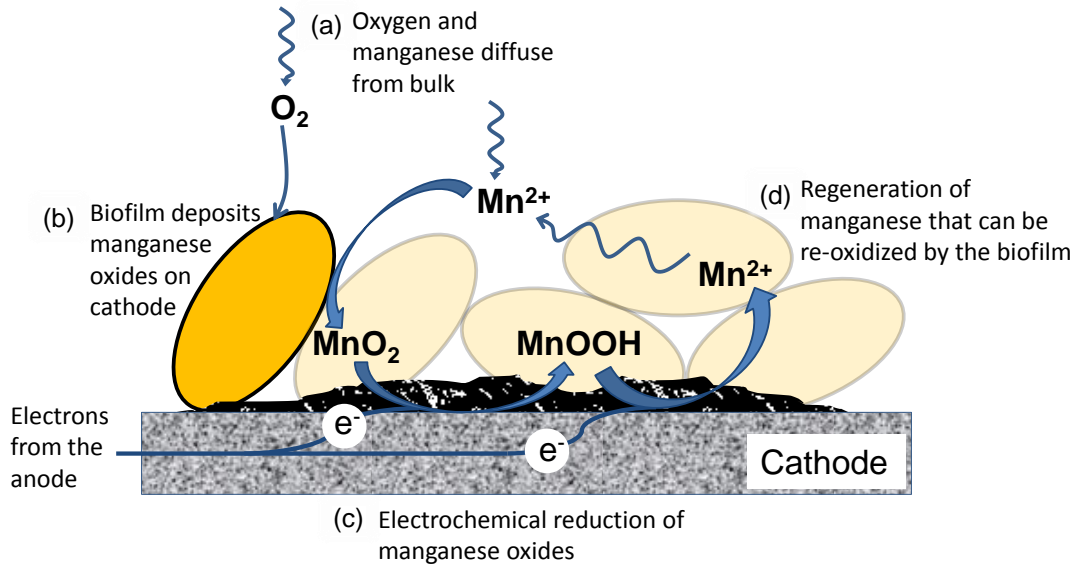

4  
5  
6  
7

Figure SI-1. Schematic diagram of manganese cycling inside biofilms of manganese-oxidizing bacteria.

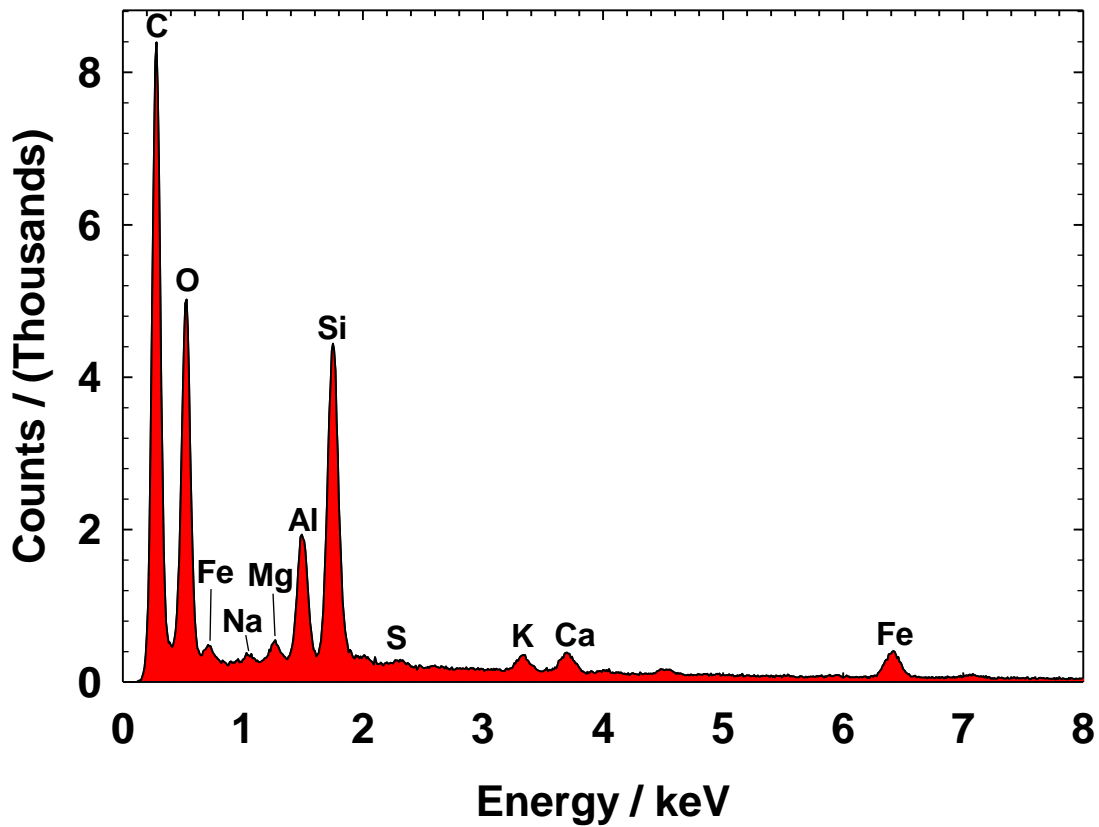

3  
4 Figure SI-2. EDS spectrum for the river cathode. Protocols for EDS were followed from  
5 Renslow et al. 2011 <sup>[1]</sup>.  
6  
7 *South Fork Palouse River water quality monitoring*  
8 The finalized river water quality in 2011 as reported by the Washington State Department of  
9 Ecology at water quality monitoring station 34B110 (less than a mile downstream from  
10 sampling site) were as follows:  $7.64 < \text{pH} < 8.32$ ,  $1.62 < \text{NH}_3 \text{ (mg L}^{-1}\text{)} < 0.058$ ,  $1.62 < \text{NO}_2/\text{NO}_3$   
11  $\text{(mg L}^{-1}\text{)} < 6.76$ ,  $0.0701 < \text{organic phosphorous (mg L}^{-1}\text{)} < 0.156$ ,  $5.8 < \text{dissolved oxygen (mg L}^{-1}\text{)}$   
12  $< 13.13$ ,  $3 < \text{suspended solids (mg L}^{-1}\text{)} < 40$ ,  $1.9 < \text{Temperature (in river; } ^\circ\text{C)} < 18.3$ ,  $3.7 < \text{total$

1 organic carbon( $\text{mg L}^{-1}$ ) $<18.3$ ,  $0.119<\text{total phosphorous}(\text{mg L}^{-1})<5.6$ . Dissolved copper was  
2 measured at approximately  $3\times 10^{-8} \text{ mol L}^{-1}$  (Washington State Department of Ecology). Note  
3 that ranges may not represent the minimum or maximum values since daily sampling times  
4 varied during the year.

5  
6 ([http://www.ecy.wa.gov/apps/watersheds/riv/station.asp?theyear=&tab=final\\_data&scrolly=5](http://www.ecy.wa.gov/apps/watersheds/riv/station.asp?theyear=&tab=final_data&scrolly=501&wria=34&sta=34B110)  
7 [01&wria=34&sta=34B110](http://www.ecy.wa.gov/apps/watersheds/riv/station.asp?theyear=&tab=final_data&scrolly=501&wria=34&sta=34B110))

## 9 **References**

- 10 [1] R. Renslow, C. Donovan, M. Shim, J. Babauta, S. Nannapaneni, J. Schenk, H.  
11 Beyenal, *Phys Chem Chem Phys* **2011**, *13*, 21573-21584.
